# Supplementary material for: 3-Dimensional stable polyelectrolyte hollow capsules: preparation and spontaneous encapsulation
Source: Royal Society of Chemistry journal article supplement (doi:10.1039/c6ra25613a), 2017-01-01
Supplement: c6ra25613a1.pdf [file c6ra25613a1.pdf]

**Supplementary Information**

**3-dimensional stable polyelectrolyte hollow capsules: Preparation and spontaneous encapsulation**

*Y.D. Chen,<sup>a</sup> J. J. Xu,<sup>a</sup> Y. Wang,<sup>a</sup> H. Chen,<sup>a,\*</sup> Q. J. Luo,<sup>b,\*</sup> X. D. Li,<sup>a</sup> and W. P. Zhu<sup>c</sup>*

<sup>a</sup>Affiliated Stomatology Hospital, College of Medicine, Zhejiang University, Hangzhou, 310006, China.

<sup>b</sup>The First Affiliated Hospital, College of Medicine, Zhejiang University, Hangzhou, 310003, P. R. China

<sup>c</sup>MOE Key Laboratory of Macromolecule Synthesis and Functionalization, Department of Polymer Science and Engineering, Zhejiang University, Hangzhou 310027, China.

\*Correspondence and requests for materials should be addressed to Hui Chen (email: huic66@hotmail.com) or to Qiaojie Luo(email: luoqiaojie@zju.edu.cn).

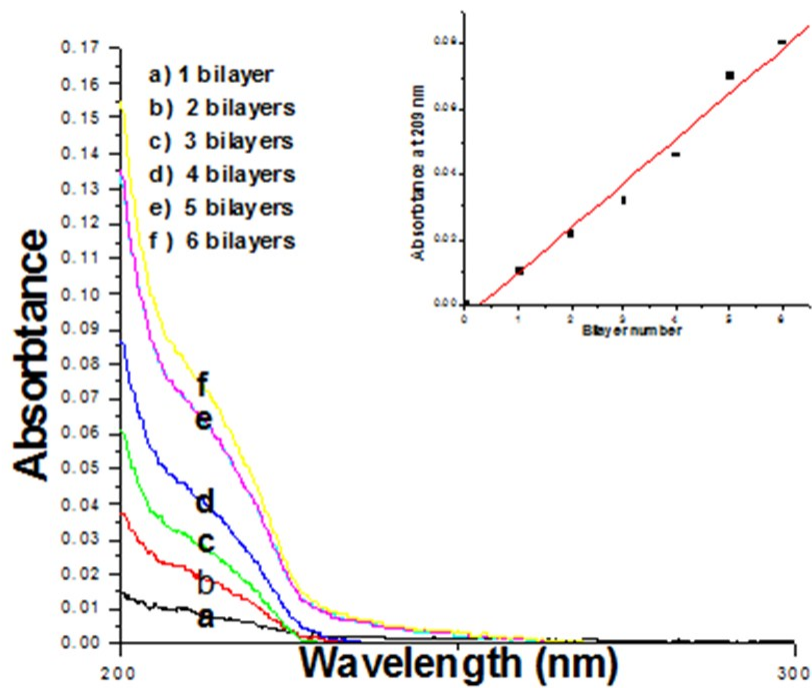

Figure S1. UV-Vis spectra of different PS-PAA/PAH multilayers with different deposition cycles on glass slides. The inset image was that the absorbed value at 209 nm vs the desposition cycles.
